# Supplementary material for: Development of Biopredictive Dissolution Method for Extended-Release Desvenlafaxine Tablets
Source: MDPI journal article supplement (doi:10.3390/pharmaceutics15051544), 2023-05-19
Supplement: s1 [file s1]

**Table S1.** Analysis of variance of Q%2h

| Effect                 | Sum of squares | Degrees of freedom | Average squares | F        | p-value  |
|------------------------|----------------|--------------------|-----------------|----------|----------|
| (1) Drug product       | 412.5274       | 2                  | 206.2637        | 43.19826 | 0.000000 |
| (2) Dissolution medium | 151.5696       | 2                  | 75.7848         | 15.87178 | 0.000106 |
| (3) Apparatus          | 381.5030       | 2                  | 190.7515        | 39.94950 | 0.000000 |
| (4) Rotation speed     | 17.4807        | 2                  | 8.7404          | 1.83052  | 0.188947 |
| Error                  | 85.9467        | 18                 | 4.7748          |          |          |

**Table S2.** Analysis of variance of Q%12h

| Effect                 | Sum of squares | Degrees of freedom | Average squares | F        | p-value  |
|------------------------|----------------|--------------------|-----------------|----------|----------|
| (1) Drug product       | 1433.662       | 2                  | 716.8311        | 48.81568 | 0.000000 |
| (2) Dissolution medium | 10.127         | 2                  | 5.0633          | 0.34481  | 0.712933 |
| (3) Apparatus          | 758.349        | 2                  | 379.1744        | 25.82150 | 0.000005 |
| (4) Rotation speed     | 11.642         | 2                  | 5.8211          | 0.39641  | 0.678459 |
| Error                  | 264.32         | 18                 | 14.6844         |          |          |

**Table S3.** Analysis of variance of Q%24h

| Effect                 | Sum of squares | Degrees of freedom | Average squares | F        | p-value  |
|------------------------|----------------|--------------------|-----------------|----------|----------|
| (1) Drug product       | 1114.290       | 2                  | 557.1448        | 50.92731 | 0.000000 |
| (2) Dissolution medium | 90.187         | 2                  | 45.0937         | 4.12191  | 0.033590 |
| (3) Apparatus          | 847.365        | 2                  | 423.6825        | 39.96185 | 0.000000 |
| (4) Rotation speed     | 20.661         | 2                  | 10.3304         | 0.94428  | 0.407403 |
| Error                  | 196.92         | 18                 | 10.9400         |          |          |

**Table S4.**

Geometric mean, ratio between Generic 1 and Reference, and 90% CI of C<sub>max</sub> and AUC<sub>0-t</sub> from the virtual bioequivalence study using the biopredictive dissolution method, as a crossover study with 25 virtual subjects.

| Trial # | PASS/FAIL | Geometric Mean |              |       |        |        | Geometric Mean     |                    |       |        |        |
|---------|-----------|----------------|--------------|-------|--------|--------|--------------------|--------------------|-------|--------|--------|
|         |           | Generic 1      | Reference    | Ratio | 90% CI |        | Generic 1          | Reference          | Ratio | 90% CI |        |
|         |           | Cmax (µg/mL)   | Cmax (µg/mL) | Cmax  | Lower  | Upper  | AUCt<br>(ng*hr/mL) | AUCt<br>(ng*hr/mL) | AUCt  | Lower  | Upper  |
| 1       | PASS      | 0.078          | 0.073        | 107.2 | 98.944 | 116.05 | 1755.2             | 1712.2             | 102.5 | 91.295 | 115.11 |
| 2       | PASS      | 0.085          | 0.077        | 110.3 | 100.43 | 121.17 | 1984.0             | 1936.4             | 102.5 | 91.743 | 114.42 |
| 3       | FAIL      | 0.090          | 0.081        | 111.0 | 98.492 | 125.14 | 2015.5             | 1931.1             | 104.4 | 95.374 | 114.21 |
| 4       | PASS      | 0.087          | 0.077        | 112.6 | 102.32 | 123.86 | 1898.9             | 1756.7             | 108.1 | 98.163 | 119.02 |
| 5       | PASS      | 0.091          | 0.080        | 114.1 | 105.64 | 123.33 | 1904.6             | 1723.1             | 110.5 | 99.516 | 122.77 |
| 6       | PASS      | 0.081          | 0.072        | 112.1 | 100.98 | 124.44 | 1758.5             | 1667.8             | 105.4 | 92.596 | 120.06 |
| 7       | PASS      | 0.085          | 0.078        | 108.0 | 98.093 | 118.88 | 1795.8             | 1759.9             | 102.0 | 88.959 | 117.04 |
| 8       | FAIL      | 0.089          | 0.077        | 116.2 | 104.07 | 129.82 | 2008.8             | 1869.1             | 107.5 | 95.221 | 121.31 |
| 9       | PASS      | 0.080          | 0.072        | 111.0 | 103.87 | 118.57 | 1808.4             | 1734.2             | 104.3 | 95.433 | 113.94 |
| 10      | FAIL      | 0.079          | 0.069        | 114.1 | 102.19 | 127.37 | 1642.4             | 1526.7             | 107.6 | 94.781 | 122.1  |

**Table S5.**

Geometric mean, ratio between Generic 2 and Reference, and 90% CI of C<sub>max</sub> and AUC<sub>0-t</sub> from the virtual bioequivalence study using the biopredictive dissolution method, as a crossover study with 25 virtual subjects.

| Trial # | PASS/FAIL | Geometric Mean |              |       |        |        | Geometric Mean     |                    |       |        |        |
|---------|-----------|----------------|--------------|-------|--------|--------|--------------------|--------------------|-------|--------|--------|
|         |           | Generic 2      | Reference    | Ratio | 90% CI |        | Generic 2          | Reference          | Ratio | 90% CI |        |
|         |           | Cmax (µg/mL)   | Cmax (µg/mL) | Cmax  | Lower  | Upper  | AUCt<br>(ng*hr/mL) | AUCt<br>(ng*hr/mL) | AUCt  | Lower  | Upper  |
| 1       | PASS      | 0.077          | 0.082        | 93.63 | 85.458 | 102.57 | 1832.5             | 1916.3             | 95.63 | 84.771 | 107.87 |
| 2       | PASS      | 0.071          | 0.074        | 95.74 | 86.833 | 105.56 | 1763.4             | 1835.9             | 96.05 | 86.542 | 106.61 |
| 3       | FAIL      | 0.078          | 0.088        | 88.05 | 79.896 | 97.044 | 1940.8             | 2109.5             | 92.00 | 82.768 | 102.27 |
| 4       | PASS      | 0.073          | 0.073        | 100.9 | 91.551 | 111.25 | 1792.6             | 1751.8             | 102.3 | 90.500 | 115.71 |
| 5       | PASS      | 0.075          | 0.078        | 96.73 | 89.845 | 104.14 | 1814.5             | 1775.8             | 102.2 | 94.133 | 110.92 |
| 6       | PASS      | 0.070          | 0.073        | 95.62 | 85.956 | 106.36 | 1763.7             | 1803.9             | 97.77 | 86.828 | 110.1  |
| 7       | PASS      | 0.076          | 0.078        | 97.92 | 88.287 | 108.61 | 1790.3             | 1752.5             | 102.2 | 92.578 | 112.73 |
| 8       | PASS      | 0.077          | 0.078        | 97.86 | 88.048 | 108.77 | 1770.1             | 1772.8             | 99.85 | 87.561 | 113.86 |
| 9       | PASS      | 0.076          | 0.079        | 96.01 | 88.53  | 104.13 | 1868.2             | 1859.4             | 100.5 | 90.209 | 111.9  |
| 10      | PASS      | 0.076          | 0.077        | 98.94 | 90.768 | 107.84 | 1768.7             | 1719.4             | 102.9 | 92.428 | 114.48 |

**Table S6.**

Geometric mean, ratio between Generic 3 and Reference, and 90% CI of  $C_{\max}$  and  $AUC_{0-t}$  from the virtual bioequivalence study using the biopredictive dissolution method, as a crossover study with 25 virtual subjects.

| Trial # | PASS/FAIL | Geometric Mean                  |                                 |            |        |        | Geometric Mean                              |                                             |         |        |        |
|---------|-----------|---------------------------------|---------------------------------|------------|--------|--------|---------------------------------------------|---------------------------------------------|---------|--------|--------|
|         |           | Generic 3                       | Reference                       | Ratio      | 90% CI |        | Generic 3                                   | Reference                                   | Ratio   | 90% CI |        |
|         |           | $C_{\max}$ ( $\mu\text{g/mL}$ ) | $C_{\max}$ ( $\mu\text{g/mL}$ ) | $C_{\max}$ | Lower  | Upper  | $AUC_t$<br>( $\text{ng}\cdot\text{hr/mL}$ ) | $AUC_t$<br>( $\text{ng}\cdot\text{hr/mL}$ ) | $AUC_t$ | Lower  | Upper  |
| 1       | PASS      | 0.078                           | 0.079                           | 98.78      | 90.034 | 108.37 | 1918.0                                      | 1922.2                                      | 99.78   | 91.248 | 109.11 |
| 2       | PASS      | 0.071                           | 0.073                           | 97.68      | 88.443 | 107.88 | 1692.3                                      | 1732.2                                      | 97.70   | 87.364 | 109.25 |
| 3       | PASS      | 0.074                           | 0.078                           | 94.57      | 86.459 | 103.44 | 1778.2                                      | 1834.8                                      | 96.91   | 86.572 | 108.49 |
| 4       | PASS      | 0.072                           | 0.071                           | 101.0      | 94.363 | 108.04 | 1704.6                                      | 1682.3                                      | 101.3   | 92.338 | 111.19 |
| 5       | PASS      | 0.066                           | 0.069                           | 95.48      | 86.723 | 105.12 | 1499.1                                      | 1535.1                                      | 97.65   | 85.837 | 111.1  |
| 6       | PASS      | 0.076                           | 0.078                           | 97.12      | 87.156 | 108.22 | 1898.2                                      | 1891.0                                      | 100.4   | 91.995 | 109.53 |
| 7       | PASS      | 0.073                           | 0.079                           | 92.98      | 84.457 | 102.37 | 1649.8                                      | 1770.6                                      | 93.18   | 80.214 | 108.23 |
| 8       | PASS      | 0.071                           | 0.072                           | 98.16      | 88.551 | 108.81 | 1717.4                                      | 1718.9                                      | 99.91   | 88.014 | 113.42 |
| 9       | PASS      | 0.081                           | 0.080                           | 101.5      | 93.314 | 110.5  | 1977.3                                      | 1956.2                                      | 101.1   | 92.491 | 110.45 |
| 10      | PASS      | 0.072                           | 0.075                           | 95.89      | 87.227 | 105.42 | 1771.7                                      | 1850.2                                      | 95.76   | 87.163 | 105.19 |
